# Supplementary material for: The Korean Version of Fear of COVID-19 Scale: Psychometric Validation in the Korean Population
Source: PubMed Central journal article supplement — Psychiatry Investig. 2021 Apr 14;18(4):332–9. doi: 10.30773/pi.2020.0420 (PMC8103023; doi:10.30773/pi.2020.0420), 2021-04-14
Supplement: pi-2020-0420-suppl.pdf [file pi-2020-0420-suppl.pdf]

## SUPPLEMENTARY MATERIALS 1

### The Korean Version of Fear of COVID-19 Scale (KF-COVID-19S)

한국판 코로나-19 불안 척도

아래의 질문들을 읽고 해당되는 응답에 대해 표시 바랍니다.

“나는 코로나바이러스감염증-19(코로나19)와 관련하여.....”

| 번 호 | 문 항                                          | 매우<br>동의하지<br>않는다 | 동의하지<br>않는다 | 동의도<br>반대도<br>아니다 | 동의<br>한다 | 매우<br>동의한다 |
|-----|----------------------------------------------|-------------------|-------------|-------------------|----------|------------|
| 1   | 코로나19를 가장 무서워한다.                             | ①                 | ②           | ③                 | ④        | ⑤          |
| 2   | 코로나19를 생각하면 마음이 불편하다.                        | ①                 | ②           | ③                 | ④        | ⑤          |
| 3   | 코로나19를 생각하면 손에 땀이 날정도다.                      | ①                 | ②           | ③                 | ④        | ⑤          |
| 4   | 코로나19때문에 목숨을 잃을까봐 두렵다.                       | ①                 | ②           | ③                 | ④        | ⑤          |
| 5   | 소셜 미디어에서 코로나19 뉴스와<br>이야기를 볼 때 초조해지거나 불안해진다. | ①                 | ②           | ③                 | ④        | ⑤          |
| 6   | 코로나19에 걸릴까봐 걱정이 되어서 잠을 잘 수가 없다.              | ①                 | ②           | ③                 | ④        | ⑤          |
| 7   | 코로나19 걸리는 생각을 하면 심장이 뛰거나 두근거린다.              | ①                 | ②           | ③                 | ④        | ⑤          |
